# Supplementary material
Source: PubMed Central journal article supplement (PMC6127517)
Supplement: mmc1.pdf [file mmc1.pdf]

YMTHE, Volume 26

## **Supplemental Information**

### **CD28- $\zeta$ CAR T Cells Resist TGF- $\beta$ Repression through IL-2 Signaling, Which Can Be Mimicked by an Engineered IL-7 Autocrine Loop**

**Viktória Golumba-Nagy, Johannes Kuehle, Andreas A. Hombach, and Hinrich Abken**

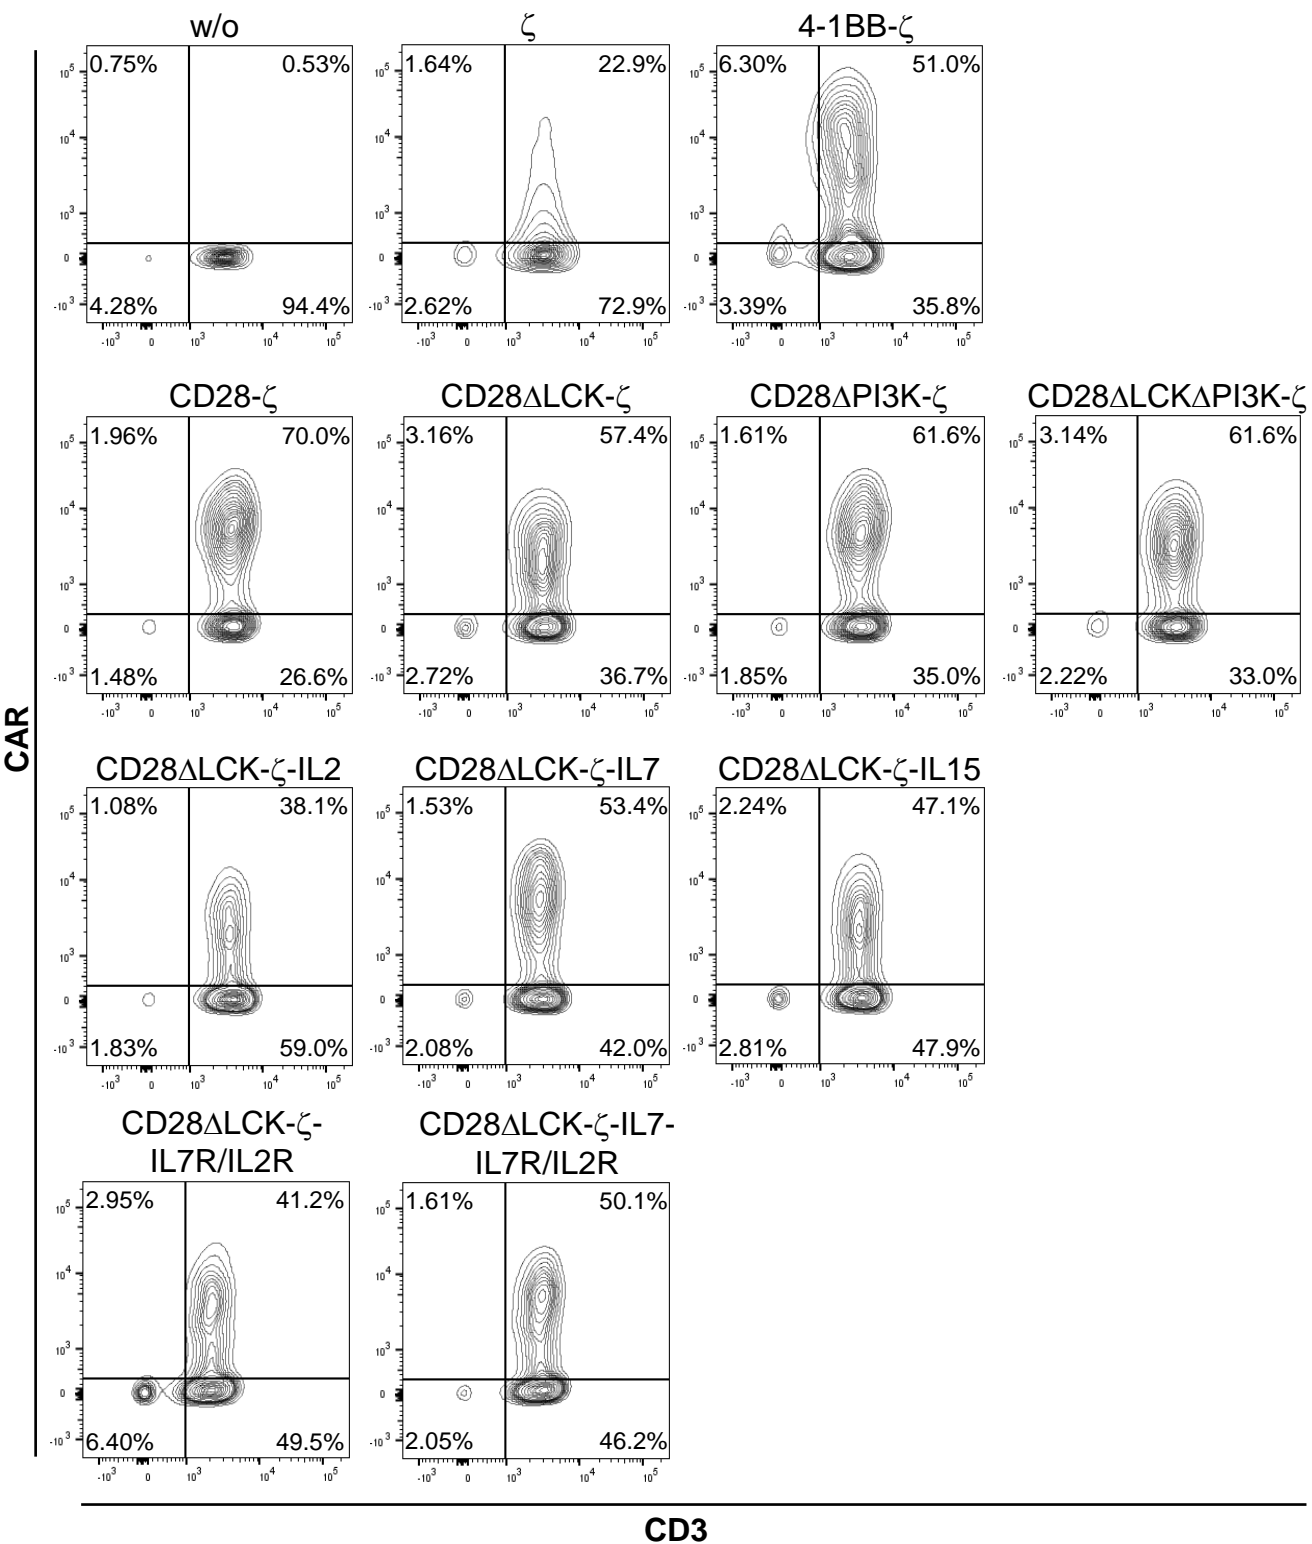

**Supplement Figure 1** Different CAR expression on human T cell surface

CAR expression on human T cell surface was measured after the transduction by flow cytometry. For CAR detection PE conjugated Goat F(ab')<sub>2</sub> anti-human IgG antibody, for CD3 labeling FITC conjugated anti-CD3 antibody were used. Percentage value in the top right area represents the CD3<sup>+</sup>CAR<sup>+</sup> T cell population.
